# Supplementary material for: Eomesodermin and T-bet mark developmentally distinct human natural killer cells
Source: JCI journal article supplement (doi:10.1172/jci.insight.90063), 2017-03-08
Supplement: sd1 [file 1]

Supplementary Figure 1

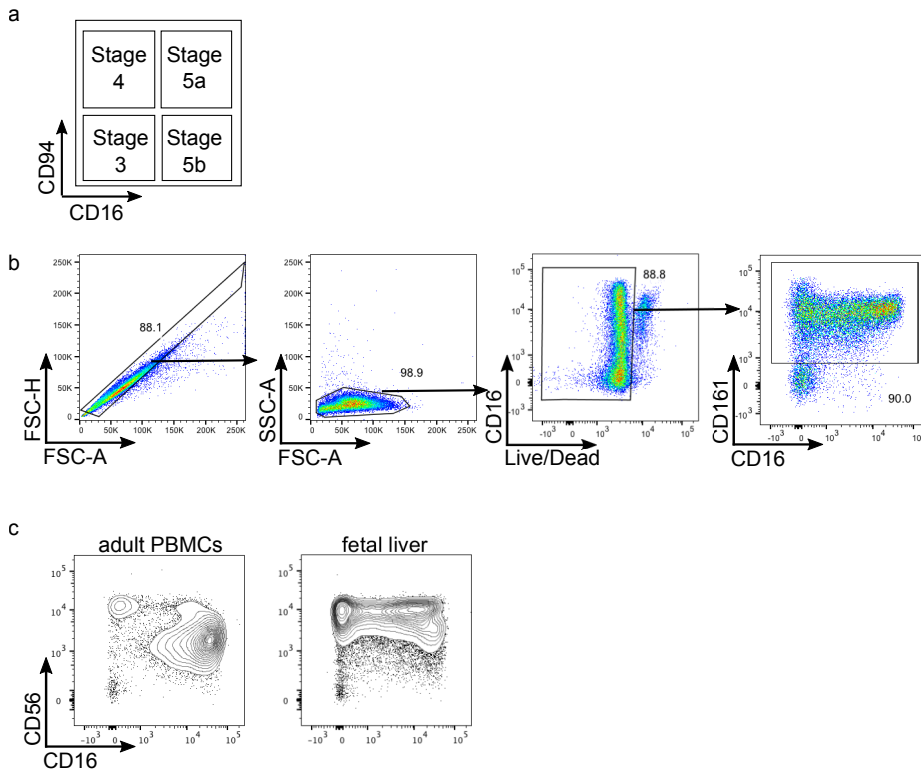

Supplementary Figure 1. (a) Schematic of stages of natural killer (NK) cell development based on CD94 and CD16 staining of Lineage<sup>neg</sup> CD161<sup>+</sup> cells. (b) Gating strategy used for identification of NK cells (singlets, live cells, CD161<sup>+</sup>) enriched by negative depletion. Cells are CD3<sup>-</sup>CD14<sup>-</sup>CD19<sup>-</sup>CD34<sup>-</sup> (data not shown). (c) Representative staining of CD16 and CD56 staining on adult peripheral blood mononuclear cells (PBMCs) and fetal liver. Experiment done > 5 times on n=4 specimens for adult PBMCs and n > 5 for fetal liver.

Supplementary Figure 2

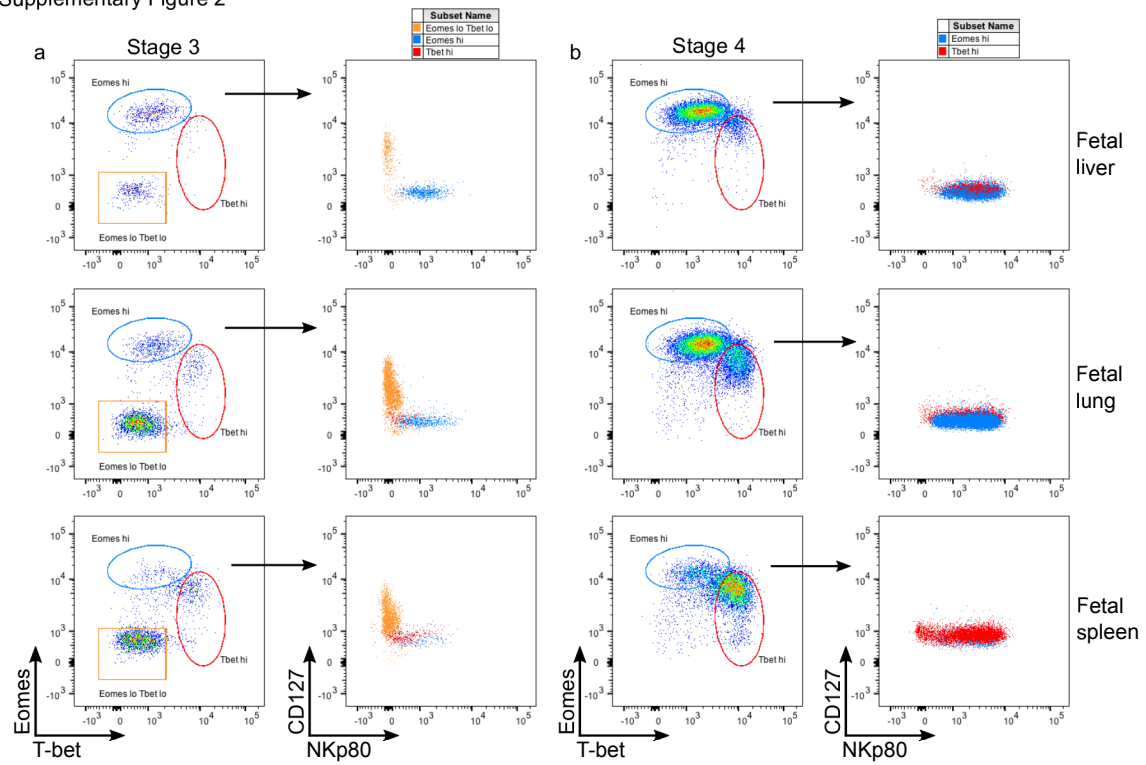

Supplementary Figure 2. Representative staining of CD127 and NKp80 on Eomes<sup>lo</sup>T-bet<sup>lo</sup>, Eomes<sup>hi</sup>, and T-bet<sup>hi</sup> populations from Stage 3 (a) and Stage 4 (b) natural killer (NK) cells. Experiment was performed 3 times on n=4 fetal specimens.
